# Supplementary material for: Impact of Diet on Plasma Lipids in Individuals with Heterozygous Familial Hypercholesterolemia: A Systematic Review of Randomized Controlled Nutritional Studies
Source: PubMed Central journal article supplement (PMC7829745; doi:10.3390/nu13010235), 2021-01-15
Supplement: nutrients-13-00235-s001.pdf [file nutrients-13-00235-s001.pdf]

**Impact of diet on plasma lipids in individuals with heterozygous familial hypercholesterolemia: a systematic review of randomized controlled nutritional studies.**

Gabrielle Roy, Anykim Boucher, Patrick Couture, Jean-Philippe Drouin-Chartier

Supplementary material

**Table S1: Systematic review search strategy<sup>1</sup>**

| Database       | Step | Search terms                                                                                                                                                                                                                                                                                                                                                                                                                                                                                                                                                                                                                   | Results    |
|----------------|------|--------------------------------------------------------------------------------------------------------------------------------------------------------------------------------------------------------------------------------------------------------------------------------------------------------------------------------------------------------------------------------------------------------------------------------------------------------------------------------------------------------------------------------------------------------------------------------------------------------------------------------|------------|
| Pubmed         | 1    | “Hyperlipoproteinemia type II” OR “familial hypercholesterolemia” OR “familial hypercholesterolemias”                                                                                                                                                                                                                                                                                                                                                                                                                                                                                                                          | 8,857      |
|                | 2    | "Cholesterol"[Mesh] OR "Cholesterol, LDL"[Mesh] OR "Cholesterol, VLDL"[Mesh] OR "Cholesterol, HDL"[Mesh] OR "Cholesterol, Dietary"[Mesh] OR "Cholesterol Esters"[Mesh] OR "Apolipoproteins"[Mesh] OR "Apolipoproteins B"[Mesh] OR "Apolipoproteins A"[Mesh] OR "Apolipoprotein B-100"[Mesh] OR "Apolipoprotein B-48"[Mesh] OR "Apolipoprotein A-I"[Mesh]                                                                                                                                                                                                                                                                       | 194,890    |
|                | 3    | “clinical trials as topic” [MESH] OR "intervention"[tiab] OR "controlled trial"[tiab] OR "randomized"[tiab] OR "randomised"[tiab] OR "random"[tiab] OR "randomly"[tiab] OR "placebo"[tiab] OR "assignment"[tiab]                                                                                                                                                                                                                                                                                                                                                                                                               | 1,975,487  |
|                | 4    | #1 AND #2                                                                                                                                                                                                                                                                                                                                                                                                                                                                                                                                                                                                                      | 4,010      |
|                | 5    | #1 AND #2 AND #3                                                                                                                                                                                                                                                                                                                                                                                                                                                                                                                                                                                                               | <b>553</b> |
| Web of science | 1    | ((TS=(("Hyperlipoproteinemia type II" OR "familial hypercholesterolemia" OR "Familial hypercholesterolemias") AND ("Cholesterol" OR "Cholesterol, LDL" OR "Cholesterol, VLDL" OR "Cholesterol, HDL" OR "Cholesterol, Dietary" OR "Cholesterol Esters" OR "Apolipoproteins"OR "Apolipoproteins B" OR "Apolipoproteins A" OR "Apolipoprotein B-100" OR "Apolipoprotein B-48" OR "Apolipoprotein A-I") AND ("Intervention Studies" OR "clinical controlled trial" OR "intervention" OR "controlled trial" OR "randomized" OR "randomised" OR "random" OR "randomly" OR "placebo" OR "assignment")))) AND DOCUMENT TYPES:(Article) | <b>867</b> |
| Embase         | 1    | ('familial hypercholesterolemia'/exp OR 'hyperlipoproteinemia type 2':ab,ti) AND 'article'/it                                                                                                                                                                                                                                                                                                                                                                                                                                                                                                                                  | 6,696      |
|                | 2    | ('cholesterol'/exp OR 'high density lipoprotein cholesterol'/exp OR 'low density lipoprotein cholesterol'/exp OR 'very low density lipoprotein cholesterol'/exp OR 'cholesterol intake'/exp OR 'apolipoprotein'/exp OR 'apolipoprotein a'/exp OR 'apolipoprotein b'/exp) AND [article]/lim                                                                                                                                                                                                                                                                                                                                     | 267,296    |
|                | 3    | 'intervention studies'/exp OR 'randomized controlled trial'/de OR 'controlled clinical trial'/de OR 'randomized':ab OR 'randomised':ab OR 'randomly':ab OR 'random':ab OR 'controlled trial':ab OR 'interventions':ab OR 'placebo':ab OR 'assignment':ab AND [article]/lim                                                                                                                                                                                                                                                                                                                                                     | 1,597,142  |
|                | 4    | #1 AND #2                                                                                                                                                                                                                                                                                                                                                                                                                                                                                                                                                                                                                      | 3,688      |
|                | 5    | #1 AND #2 AND #3                                                                                                                                                                                                                                                                                                                                                                                                                                                                                                                                                                                                               | <b>491</b> |

<sup>1</sup> Search date : 2020-11-25.

**Table S2: Results of included studies on plasma lipids other than LDL-C, Total-C and Apo B.**

| Author, Year                    | Control                                                                     | Intervention                                                                | Outcomes                                                          | Post-treatment concentration <sup>1</sup>                                 |                                                                                     | Difference (%) | P value     |             |     |
|---------------------------------|-----------------------------------------------------------------------------|-----------------------------------------------------------------------------|-------------------------------------------------------------------|---------------------------------------------------------------------------|-------------------------------------------------------------------------------------|----------------|-------------|-------------|-----|
|                                 |                                                                             |                                                                             |                                                                   | Control                                                                   | Intervention                                                                        |                |             |             |     |
| <i>Food-based interventions</i> |                                                                             |                                                                             |                                                                   |                                                                           |                                                                                     |                |             |             |     |
| Gustafsson et al., 1983 [16]    | Fully controlled diet with a polyunsaturated-to-saturated fat ratio of 1.3  | Fully controlled diet with polyunsaturated-to-saturated fat ratio of 2.0    | HDL-C                                                             | 1.22                                                                      | 1.22                                                                                | 0.0            | NS          |             |     |
|                                 |                                                                             |                                                                             | VLDL-C                                                            | 0.42                                                                      | 0.33                                                                                | -21.4          | NS          |             |     |
|                                 |                                                                             |                                                                             | LDL-TG                                                            | 0.55                                                                      | 0.51                                                                                | -7.3           | NS          |             |     |
|                                 |                                                                             |                                                                             | HDL-TG                                                            | 0.22                                                                      | 0.21                                                                                | -4.5           | NS          |             |     |
|                                 |                                                                             |                                                                             | VLDL-TG                                                           | 0.71                                                                      | 0.73                                                                                | 2.8            | NS          |             |     |
|                                 |                                                                             |                                                                             | Apo A-I                                                           | 1.11                                                                      | 1.14                                                                                | 2.7            | NS          |             |     |
|                                 |                                                                             |                                                                             | Apo A-II                                                          | 1.17                                                                      | 1.18                                                                                | 0.9            | NS          |             |     |
| Friday et al., 1991 [17]        | Fully controlled diet with 82.4 g of butter /2,000 kcal/ day                | 1. Fully controlled diet with 67 g of safflower oil /2,000 kcal/day         | HDL-C                                                             | 1.27 ± 0.18                                                               | 1.19 ± 0.16                                                                         | -6.3           | NS          |             |     |
|                                 |                                                                             |                                                                             | VLDL-C                                                            | 0.75 ± 0.15                                                               | 0.67 ± 0.10                                                                         | -10.7          | NS          |             |     |
|                                 |                                                                             |                                                                             | IDL-C                                                             | 0.67 ± 0.10                                                               | 0.36 ± 0.08                                                                         | -46.3          | 0.02        |             |     |
|                                 |                                                                             |                                                                             | TG                                                                | 1.34 ± 0.29                                                               | 1.16 ± 0.23                                                                         | -13.4          | NS          |             |     |
|                                 |                                                                             |                                                                             | Apo A-1                                                           | 1.22 ± 0.10                                                               | 1.30 ± 0.60                                                                         | 6.6            | NS          |             |     |
|                                 |                                                                             |                                                                             | Apo A-II                                                          | 0.27 ± 0.02                                                               | 0.28 ± 0.01                                                                         | 3.7            | NS          |             |     |
|                                 |                                                                             |                                                                             | 2. Fully controlled diet with 67 g of salmon oil/ 2,000 kcal/ day | HDL-C                                                                     | 1.27 ± 0.18                                                                         | 1.11 ± 0.16    | -12.6       | 0.003       |     |
|                                 |                                                                             | VLDL-C                                                                      |                                                                   | 0.75 ± 0.15                                                               | 0.21 ± 0.03                                                                         | -72.0          | 0.02        |             |     |
|                                 |                                                                             | IDL-C                                                                       |                                                                   | 0.67 ± 0.10                                                               | 0.21 ± 0.05                                                                         | -68.7          | 0.01        |             |     |
|                                 |                                                                             | TG                                                                          |                                                                   | 1.34 ± 0.29                                                               | 0.71 ± 0.12                                                                         | -47.0          | 0.03        |             |     |
|                                 |                                                                             | Apo A-1                                                                     |                                                                   | 1.22 ± 0.10                                                               | 1.16 ± 0.09                                                                         | -4.9           | NS          |             |     |
|                                 |                                                                             | Apo A-II                                                                    |                                                                   | 0.27 ± 0.02                                                               | 0.24 ± 0.02                                                                         | -11.1          | NS          |             |     |
|                                 |                                                                             | Laurin et al., 1991 [18]                                                    |                                                                   | Fully controlled diet with 35% of protein intake provided from cow's milk | Fully controlled diet with 35% of protein intake provided from soy protein beverage | HDL-C          | 1.15 ± 0.06 | 1.20 ± 0.07 | 4.3 |
|                                 |                                                                             |                                                                             | HDL <sub>2</sub> -C                                               |                                                                           |                                                                                     | 0.55 ± 0.07    | 0.54 ± 0.07 | -1.8        | NS  |
| HDL <sub>3</sub> -C             | 0.60 ± 0.03                                                                 |                                                                             | 0.66 ± 0.02                                                       |                                                                           |                                                                                     | 10.0           | <0.03       |             |     |
| VLDL-C                          | 0.45 ± 0.05                                                                 |                                                                             | 0.35 ± 0.04                                                       |                                                                           |                                                                                     | -22.2          | <0.05       |             |     |
| TG                              | 1.02 ± 0.11                                                                 |                                                                             | 0.80 ± 0.08                                                       |                                                                           |                                                                                     | -21.6          | <0.05       |             |     |
| Phospholipids                   | 3.05 ± 0.11                                                                 |                                                                             | 2.96 ± 0.09                                                       |                                                                           |                                                                                     | -3.0           | NS          |             |     |
| Wolfe et al., 1992 [19]         | Fully controlled diet with 10% of energy as protein and 65% as carbohydrate | Fully controlled diet with 27% of energy as protein and 48% as carbohydrate | HDL-C                                                             | 1.0 ± 0.3                                                                 | 1.1 ± 0.3                                                                           | 10.0           | NS          |             |     |
|                                 |                                                                             |                                                                             | TG                                                                | 2.2 ± 0.7                                                                 | 1.7 ± 0.7                                                                           | -22.7          | NS          |             |     |
| Fuentes et al., 2008 [20]       | Fully controlled diet with 280–300 mg/ day of dietary cholesterol           | Fully controlled diet with 150 mg/ day of dietary cholesterol               | HDL-C                                                             | 1.34 ± 0.39                                                               | 1.37 ± 0.36                                                                         | 2.2            | NS          |             |     |
|                                 |                                                                             |                                                                             | TG                                                                | 1.19 ± 0.64                                                               | 1.14 ± 0.50                                                                         | -4.2           | NS          |             |     |
|                                 |                                                                             |                                                                             | Apo A-I                                                           | 1.44 ± 0.24                                                               | 1.47 ± 0.26                                                                         | 2.1            | NS          |             |     |

| <b><i>Dietary counseling interventions</i></b> |                                                                                                                                                                                        |                                                                                                                                                                                                                                                                                                                      |         |             |             |       |       |
|------------------------------------------------|----------------------------------------------------------------------------------------------------------------------------------------------------------------------------------------|----------------------------------------------------------------------------------------------------------------------------------------------------------------------------------------------------------------------------------------------------------------------------------------------------------------------|---------|-------------|-------------|-------|-------|
| Chisholm et al., 1994 [21]                     | Exchange lists, recipes and nutritional counseling given every 15 or 30 days by an experienced dietician to adopt a high fat diet (38% energy from fat, 14% energy from saturated fat) | Exchange lists, recipes and nutritional counseling given every 15 or 30 days by an experienced dietician to adopt a low fat diet (27% energy from fat, 8% energy from saturated fat)                                                                                                                                 | HDL-C   | 1.44 ± 0.38 | 1.33 ± 0.35 | -7.6  | <0.05 |
|                                                |                                                                                                                                                                                        |                                                                                                                                                                                                                                                                                                                      | TG      | 1.49 ± 0.76 | 1.55 ± 0.78 | 4.0   | NS    |
| Broekhuizen et al., 2012 [22]                  | Care as usual (n=159)                                                                                                                                                                  | Web-based tailored lifestyle advices, 5 personal counselling interventions (1 face-to-face and 4 telephone booster calls); the goal was to adopt and maintain a healthier lifestyle regarding physical activity, saturated fat intake, fruit and vegetables intake, smoking and compliance to statin therapy (n=181) | HDL-C   | 1.2 ± 0.4   | 1.2 ± 0.4   | 0.0   | NS    |
|                                                |                                                                                                                                                                                        |                                                                                                                                                                                                                                                                                                                      | TG      | 1.2 ± 0.6   | 1.3 ± 0.7   | 8.3   | NS    |
| Helk et al., 2019 [23]                         | Counseling sessions led by an experienced dietician where practical advices on how to replace as many visible fat sources as possible with rapeseed oil were given                     | Counseling sessions led by an experienced dietician where recipes and practical advices on how to replace as many visible fat sources as possible with rapeseed oil and how to enrich diet in soy protein                                                                                                            | HDL-C   | 1.51 ± 0.33 | 1.63 ± 0.24 | 7.9   | NS    |
|                                                |                                                                                                                                                                                        |                                                                                                                                                                                                                                                                                                                      | VLDL-C  | 0.41 ± 0.09 | 0.37 ± 0.12 | -9.8  | NS    |
|                                                |                                                                                                                                                                                        |                                                                                                                                                                                                                                                                                                                      | TG      | 0.90 ± 0.18 | 0.81 ± 0.26 | -10.0 | NS    |
|                                                |                                                                                                                                                                                        |                                                                                                                                                                                                                                                                                                                      | Lp(a)   | 0.59 ± 0.59 | 0.30 ± 0.29 | -49.2 | NS    |
|                                                |                                                                                                                                                                                        |                                                                                                                                                                                                                                                                                                                      | Apo A-I | 1.37 ± 0.15 | 1.36 ± 0.13 | -0.7  | NS    |
| <b><i>Dietary supplement interventions</i></b> |                                                                                                                                                                                        |                                                                                                                                                                                                                                                                                                                      |         |             |             |       |       |
| <b><i>ω-3 supplementation</i></b>              |                                                                                                                                                                                        |                                                                                                                                                                                                                                                                                                                      |         |             |             |       |       |
| Balestrieri et al., 1996 [24]                  | Olive oil capsules (6 g/day)                                                                                                                                                           | Fish oil ethyl ester in capsules (6 g/day)                                                                                                                                                                                                                                                                           | HDL-C   | 1.3 ± 0.5   | 1.4 ± 0.5   | 7.7   | NS    |
|                                                |                                                                                                                                                                                        |                                                                                                                                                                                                                                                                                                                      | TG      | 1.3 ± 0.7   | 1.0 ± 0.3   | -23.1 | NS    |
|                                                |                                                                                                                                                                                        |                                                                                                                                                                                                                                                                                                                      | Apo A-I | 1.3 ± 0.4   | 1.3 ± 0.5   | 0.0   | NS    |

|                                    |                                                 |                                                                                                                                                                     |                     |                          |                         |       |         |
|------------------------------------|-------------------------------------------------|---------------------------------------------------------------------------------------------------------------------------------------------------------------------|---------------------|--------------------------|-------------------------|-------|---------|
| Chan et al., 2016 [25]             | No placebo (usual diet)                         | $\omega$ -3 fatty acid ethyl ester supplement (4 g/day)                                                                                                             | HDL-C               | 1.19 $\pm$ 0.12          | 1.12 $\pm$ 0.05         | -5.9  | NS      |
|                                    |                                                 |                                                                                                                                                                     | Non-HDL-C           | 3.39 $\pm$ 0.27          | 3.07 $\pm$ 0.18         | -9.4  | NS      |
|                                    |                                                 |                                                                                                                                                                     | TG                  | 1.30 $\pm$ 0.14          | 1.05 $\pm$ 0.09         | -19.2 | 0.01    |
|                                    |                                                 |                                                                                                                                                                     | VLDL-apoB-100       | 0.08 $\pm$ 0.01          | 0.06 $\pm$ 0.01         | -25.0 | 0.01    |
|                                    |                                                 |                                                                                                                                                                     | Apo B-48            | 0.008 $\pm$ 0.002        | 0.006 $\pm$ 0.001       | -25.0 | 0.03    |
|                                    |                                                 |                                                                                                                                                                     | Lp(a)               | 0.44 $\pm$ 0.11          | 0.42 $\pm$ 0.10         | -4.5  | NS      |
| Hande et al., 2019 [15]            | Olive oil capsules (4 g/day)                    | $\omega$ -3 fatty acid supplements with 460 mg of eicosapentaenoic acid + 380 mg of docosahexaenoic acid (4 g/day)                                                  | HDL-C               | 1.4 $\pm$ 0.4            | 1.4 $\pm$ 0.4           | 0.0   | NS      |
|                                    |                                                 |                                                                                                                                                                     | TG                  | 1.01 $\pm$ 0.76          | 0.74 $\pm$ 0.35         | -26.7 | <0.0001 |
| <i>Phytosterol supplementation</i> |                                                 |                                                                                                                                                                     |                     |                          |                         |       |         |
| Gylling et al., 1995 [26]          | Rapeseed oil margarine without sitostanol ester | Rapeseed oil margarine enriched in sitostanol ester (3 g/day of sitostanol)                                                                                         | HDL-C               | 1.20 $\pm$ 0.07          | 1.25 $\pm$ 0.08         | 4.2   | NS      |
|                                    |                                                 |                                                                                                                                                                     | HDL <sub>2</sub> -C | 0.62 $\pm$ 0.08          | 0.68 $\pm$ 0.08         | 9.7   | NS      |
|                                    |                                                 |                                                                                                                                                                     | HDL <sub>3</sub> -C | 0.51 $\pm$ 0.02          | 0.50 $\pm$ 0.02         | -2.0  | NS      |
|                                    |                                                 |                                                                                                                                                                     | VLDL-C              | 0.26 $\pm$ 0.06          | 0.25 $\pm$ 0.07         | -3.8  | NS      |
|                                    |                                                 |                                                                                                                                                                     | IDL-C               | 0.27 $\pm$ 0.08          | 0.20 $\pm$ 0.07         | -25.9 | <0.05   |
|                                    |                                                 |                                                                                                                                                                     | HDL-C/LDL-C         | 0.23 $\pm$ 0.03          | 0.30 $\pm$ 0.04         | 30.4  | <0.05   |
|                                    |                                                 |                                                                                                                                                                     | TG                  | 1.03 $\pm$ 0.13          | 0.92 $\pm$ 0.12         | -10.7 | NS      |
| Neil et al., 2001 [27]             | Placebo fat spread (25 g/day)                   | Plant sterol-enriched fat spread (25 g/day) providing 2.5 g/day of phytosterols ( $\beta$ -sitosterol: 50%; campesterol: 25%; stigmasterol: 20%; other sterols: 5%) | HDL-C               | 1.43 $\pm$ 0.36          | 1.49 $\pm$ 0.36         | 4.2   | <0.01   |
|                                    |                                                 |                                                                                                                                                                     | VLDL-C              | 0.81 $\pm$ 0.38          | 0.73 $\pm$ 0.30         | -9.9  | NS      |
|                                    |                                                 |                                                                                                                                                                     | TG                  | 1.29 (95% CI: 0.66-3.93) | 1.27 (5% CI: 0.65-3.80) | -1.6  | NS      |
|                                    |                                                 |                                                                                                                                                                     | Apo A-I             | 1.47 $\pm$ 0.26          | 1.41 $\pm$ 0.25         | -4.1  | NS      |
| Amundsen et al., 2002 [28]         | Placebo fat spread (20 g/day)                   | Plant sterol-enriched fat spread (20 g/day) providing 1.60 $\pm$ 0.13 g / day of sterol esters (sitosterol: 50%)                                                    | HDL-C               | 1.25 $\pm$ 0.31          | 1.26 $\pm$ 0.35         | 0.8   | NS      |
|                                    |                                                 |                                                                                                                                                                     | TG                  | 0.78 $\pm$ 0.33          | 0.80 $\pm$ 0.37         | 2.6   | NS      |
|                                    |                                                 |                                                                                                                                                                     | Apo A-I             | 1.35 $\pm$ 0.23          | 1.32 $\pm$ 0.26         | -2.2  | NS      |
| de Jonhg et al., 2003 [29]         | Placebo margarine (15 g/day)                    | Plant sterol spread (15 g/day) providing 2.3 g of sterols (sitosterol: 46.9%; campesterol: 27.3%;                                                                   | HDL-C               | 1.29 $\pm$ 0.29          | 1.31 $\pm$ 0.31         | 1.6   | NS      |
| TG                                 | 0.90 $\pm$ 0.40                                 | 0.85 $\pm$ 0.36                                                                                                                                                     | -5.6                | NS                       |                         |       |         |

|                                         |                                                                                                                                                  | stigmasterol: 16.3%; other sterols: 9.5%)                                                                              |               |                            |                            |       |      |
|-----------------------------------------|--------------------------------------------------------------------------------------------------------------------------------------------------|------------------------------------------------------------------------------------------------------------------------|---------------|----------------------------|----------------------------|-------|------|
| O'Neill et al., 2004 [30]               | Placebo margarine (20 g/day)                                                                                                                     | 1. Plant sterol-enriched fat spread (20 g/day) providing 1.6 g / day of free sterols + 1 placebo cereal bar (25 g/day) | HDL-C         | 1.33 ± 0.06                | 1.31 ± 0.07                | -1.5  | NS   |
|                                         |                                                                                                                                                  |                                                                                                                        | Total-C/HDL-C | 4.6 ± 0.20                 | 4.6 ± 0.22                 | 0.0   | 0.05 |
|                                         |                                                                                                                                                  |                                                                                                                        | TG            | 1.43 ± 0.09                | 1.31 ± 0.08                | -8.4  | NS   |
|                                         | 2. Plant stanol-enriched fat spread (20 g/day) providing 1.6 g / day of free stanols + 1 placebo cereal bar (25 g/day)                           | HDL-C                                                                                                                  | 1.38 ± 0.06   | 1.33 ± 0.05                | -3.6                       | NS    |      |
|                                         |                                                                                                                                                  | Total-C/HDL-C                                                                                                          | 4.4 ± 0.18    | 4.3 ± 0.18                 | -2.3                       | NS    |      |
|                                         |                                                                                                                                                  | TG                                                                                                                     | 1.43 ± 0.12   | 1.32 ± 0.13                | -7.7                       | NS    |      |
|                                         | 3. Plant stanol-enriched fat spread (20 g/day) providing 1.6 g/day of free stanols + 1 cereal bar (25 g/day) providing 1.0 g/day of stanol ester | HDL-C                                                                                                                  | 1.30 ± 0.05   | 1.24 ± 0.05                | -4.6                       | 0.02  |      |
|                                         |                                                                                                                                                  | Total-C/HDL-C                                                                                                          | 4.6 ± 0.20    | 4.4 ± 0.20                 | -4.3                       | 0.03  |      |
|                                         |                                                                                                                                                  | TG                                                                                                                     | 1.60 ± 0.09   | 1.36 ± 0.09                | -15.0                      | 0.005 |      |
| Jakulj et al., 2006 [31]                | Low-fat placebo yogurt (500 mL/day)                                                                                                              | Low-fat yogurt enriched with 2.0 g of plant stanols (500 mL/day)                                                       | HDL-C         | 1.38 ± 0.27                | 1.35 ± 0.24                | -2.2  | NS   |
|                                         |                                                                                                                                                  |                                                                                                                        | TG            | 0.57 (95% CI: 0.51 - 0.93) | 0.61 (95% CI: 0.51-0.84)   | 7.0   | NS   |
| Fuentes et al., 2008 [20]               | Fully controlled diet with 280–300 mg/day of dietary cholesterol and 0.5 g/day of plant sterols                                                  | Fully controlled diet with 280–300 mg/day of cholesterol and 2.5 g/day of plant sterols                                | HDL-C         | 1.34 ± 0.39                | 1.37 ± 0.31                | 2.2   | NS   |
|                                         |                                                                                                                                                  |                                                                                                                        | TG            | 1.19 ± 0.64                | 1.07 ± 0.52                | -10.1 | NS   |
|                                         |                                                                                                                                                  |                                                                                                                        | Apo A-I       | 1.44 ± 0.24                | 1.47 ± 0.21                | 2.1   | NS   |
| <i>Other type of dietary supplement</i> |                                                                                                                                                  |                                                                                                                        |               |                            |                            |       |      |
| Wirth et al., 1982 [32]                 | Usual diet                                                                                                                                       | Granulated guar gum form (15.6 g/day)                                                                                  | HDL-C         | 1.42 ± 0.39                | 1.24 ± 0.34                | -12.7 | NS   |
|                                         |                                                                                                                                                  |                                                                                                                        | LDL-C/HDL-C   | 4.96                       | 5.20                       | 4.8   | NS   |
|                                         |                                                                                                                                                  |                                                                                                                        | TG            | 1.47 ± 0.79                | 1.87 ± 0.50                | 27.2  | NS   |
|                                         |                                                                                                                                                  |                                                                                                                        | Apo A-I       | 1.17 ± 0.12                | 1.21 ± 0.10                | 3.4   | NS   |
| Greyling et al., 2006 [33]              | Placebo capsules                                                                                                                                 | Policosanol supplements providing 20 mg of policosanol / day                                                           | HDL-C         | 1.19 (95% CI: 1.06 - 1.32) | 1.25 (95% CI: 1.08-1.41)   | 5.0   | NS   |
|                                         |                                                                                                                                                  |                                                                                                                        | TG            | 1.32 (95% CI: 0.93 - 1.71) | 1.29 (95% CI: 0.89 - 1.68) | -2.3  | NS   |

<sup>1</sup> Values are expressed in mmol/L for lipoprotein fractions and in g/L for apolipoproteins.
